# Supplementary material for: Blood Pressure-Lowering Effect of Wine Lees Phenolic Compounds Is Mediated by Endothelial-Derived Factors: Role of Sirtuin 1
Source: MDPI journal article supplement (doi:10.3390/antiox10071073), 2021-07-03
Supplement: s1 [file s1]

**Table S1.** Non-anthocyanin composition of wine lees powder obtained by UHPLC-(ESI)-Q-TOF-MS

| Compound                                | Quantity (µg/g)  |
|-----------------------------------------|------------------|
| <b>Flavanols</b>                        |                  |
| Catechin                                | 3,599.26 ± 17.70 |
| Catechin gallate                        | 29.49 ± 0.37     |
| Epicatechin                             | 1,602.95 ± 5.64  |
| (Epi)catechin <i>O</i> -glucoside iso1  | 18.43 ± 0.01     |
| (Epi)catechin <i>O</i> -glucoside iso2  | 12.17 ± 0.00     |
| (Epi)catechin <i>O</i> -glucoside iso3  | 54.19 ± 1.08     |
| Procyanidin dimer B2                    | 1,275.58 ± 0.37  |
| Procyanidin dimer iso1                  | 2,367.19 ± 5.64  |
| Procyanidin dimer iso2                  | 525.71 ± 2.30    |
| Procyanidin dimer iso3                  | 109.12 ± 0.76    |
| Procyanidin dimer iso4                  | 471.89 ± 3.92    |
| Procyanidin dimer iso5                  | 159.26 ± 0.82    |
| Procyanidin trimer iso1                 | 600.18 ± 3.80    |
| Procyanidin trimer iso2                 | 529.03 ± 9.77    |
| Procyanidin trimer iso3                 | 225.25 ± 2.14    |
| Procyanidin trimer iso4                 | 118.71 ± 3.90    |
| Procyanidin trimer iso5                 | 508.39 ± 3.51    |
| <b>Flavonols</b>                        |                  |
| Quercetin                               | 1,355.94 ± 4.47  |
| Quercetin-3- <i>O</i> -glucoside        | 60.09 ± 0.39     |
| Quercetin-3- <i>O</i> -glucuronide      | 89.22 ± 0.76     |
| Kaempferol                              | 189.86 ± 1.50    |
| Kaempferol-3- <i>O</i> -glucuronide     | 17.70 ± 0.35     |
| Isorhamnetin                            | 411.43 ± 2.31    |
| <b>Phenolic acids</b>                   |                  |
| Gallic acid                             | 4,456.04 ± 89.03 |
| Caffeic acid                            | 120.55 ± 0.77    |
| Caffeic acid <i>O</i> -glucoside iso1   | 20.28 ± 0.74     |
| Caffeic acid <i>O</i> -glucoside iso2   | 24.33 ± 1.11     |
| p-Coumaric acid                         | 126.82 ± 0.68    |
| 4-Hydroxybenzoic acid                   | 61.57 ± 2.14     |
| Ferulic acid                            | 27.65 ± 0.43     |
| Vanillic acid                           | 85.90 ± 2.41     |
| <b>Stilbenes</b>                        |                  |
| trans-Resveratrol                       | 169.59 ± 0.74    |
| Resveratrol iso1                        | 108.76 ± 0.37    |
| Resveratrol <i>O</i> -glucoside iso1    | 9.95 ± 0.37      |
| Resveratrol <i>O</i> -glucoside iso2    | 49.77 ± 1.47     |
| Piceatannol                             | 154.84 ± 2.00    |
| Piceatannol 3- <i>O</i> -glucoside iso1 | 8.11 ± 0.00      |
| Piceatannol 3- <i>O</i> -glucoside iso2 | 2.21 ± 0.00      |
| Viniferin-iso1                          | 9.95 ± 0.00      |
| Viniferin-iso2                          | 29.86 ± 0.41     |

Data are represented per g of wet weight.

**Table S2.** Anthocyanin composition of wine lees powder obtained by UHPLC-(ESI)-Q-TOF-MS

| Anthocyanins                                                   | Quantity (µg/g)  |
|----------------------------------------------------------------|------------------|
| Gallocatechin-malvidin-3-glucoside dimer                       | 9.09 ± 0.04      |
| Malvidin-3-glucoside-(epi)catechin                             | 40.95 ± 0.12     |
| Delphinidin-3-glucoside                                        | 136.02 ± 1.68    |
| Cyanidin-3-glucoside                                           | 8.34 ± 0.75      |
| Petunidin-3-glucoside                                          | 185.45 ± 2.08    |
| Petunidin-3-glucoside-pyruvic acid                             | 3.28 ± 0.04      |
| Peonidin-3-glucoside                                           | 100.31 ± 2.30    |
| Malvidin-3-glucoside                                           | 2,236.82 ± 18.44 |
| Peonidin-3-glucoside-pyruvic acid                              | 1.50 ± 0.03      |
| Delphinidin-(6-acetyl)-3-glucoside                             | 33.48 ± 0.83     |
| Visitin A (malvidin-3-glucoside-pyruvic acid)                  | 45.23 ± 0.12     |
| Visitin B (malvidin-3-glucoside-acetaldehyde)                  | 112.92 ± 0.54    |
| Malvidin-3-glucoside-ethyl-(epi)catechin                       | 13.47 ± 0.03     |
| Cyanidin-(6-acetyl)-3-glucoside                                | 7.50 ± 0.21      |
| Acetylvisitin A                                                | 28.95 ± 0.41     |
| Malvidin-3-glucoside-ethyl-(epi)catechin                       | 50.75 ± 0.22     |
| Petunidin-(6-acetyl)-3-glucoside                               | 47.51 ± 1.72     |
| Malvidin-3-glucoside-ethyl-(epi)catechin                       | 75.36 ± 0.67     |
| Acetylvisitin B                                                | 61.24 ± 0.41     |
| Peonidin-(6-acetyl)-3-glucoside                                | 48.65 ± 1.14     |
| Delphinidin-(6-coumaroyl)-3-glucoside                          | 16.10 ± 0.25     |
| Malvidin-(6-acetyl)-3-glucoside                                | 1,046.67 ± 0.77  |
| Coumaroylvisitin A                                             | 7.38 ± 0.06      |
| Malvidin-(6-caffeoyl)-3-glucoside                              | 13.42 ± 0.25     |
| Cyanidin-(6-coumaroyl)-3-glucoside                             | 3.65 ± 0.15      |
| Catechin-ethyl-Malvidin-3-acetylglucoside dimer                | 32.34 ± 0.29     |
| Petunidin-(6-coumaroyl)-3-glucoside                            | 27.46 ± 0.33     |
| Pinotin A (malvidin-3-glucoside-vinylcatechol)                 | 30.96 ± 0.47     |
| Malvidin-glucoside-vinyl-catechin                              | 5.64 ± 0.03      |
| Coumaroylvisitin B                                             | 33.62 ± 0.26     |
| Malvidin-3-glucoside-vinylguaiacol                             | 21.92 ± 0.18     |
| Catechin-ethyl-malvidin-3-coumaroylglucoside dimer             | 25.24 ± 0.10     |
| Catechin-ethyl-malvidin-3-acetylglucoside dimer                | 5.33 ± 0.06      |
| Peonidin-(6-coumaroyl)-3-glucoside                             | 34.82 ± 1.00     |
| Malvidin-(6-coumaroyl)-3-glucoside                             | 396.97 ± 0.55    |
| Malvidin-glucoside-vinyl-catechin                              | 5.99 ± 0.02      |
| Acetyl-pinotin A                                               | 0.26 ± 0.00      |
| Malvidin 3-O-glucoside 4-vinylphenol (Pigment A)               | 23.58 ± 0.07     |
| Catechin-ethyl-malvidin-3-coumaroylglucoside dimer             | 4.37 ± 0.01      |
| Malvidin acetyl 3-O-glucoside 4-vinylphenol (Acetyl-pigment A) | 14.12 ± 0.16     |

Data are represented per g of wet weight.
